# Supplementary material
Source: PubMed Central journal article supplement (PMC7144476)
Supplement: NIHMS1038677-supplement-Supplemental_figures.pdf [file NIHMS1038677-supplement-Supplemental_figures.pdf]

**A**

| Protein  | Gene      | Peptide numbers | Sequence coverage |
|----------|-----------|-----------------|-------------------|
| BSU1-YFP | At1g03445 | 51(51)          | 76.5%             |
| BSL1     | At4g03080 | 44(38)          | 64.2%             |
| BSL2     | At1g08420 | 49(11)          | 60.2%             |
| BSL3     | At2g27210 | 48(10)          | 59.1%             |

**B**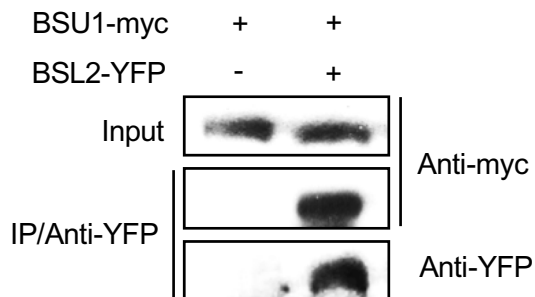**C**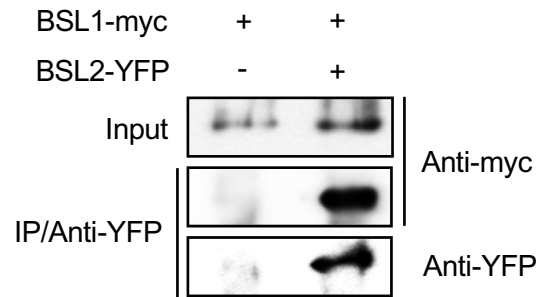**Supplemental Figure 1. BSU1 Family Members Exist in Complexes *in vivo*.**

**(A)** LC-MS/MS analyses of proteins co-immunoprecipitated with BSU1-YFP. BSU1-YFP was immunoprecipitated from protein extracts of BSU1-YFP transgenic *Arabidopsis* plants with anti-YFP antibodies. Associated proteins were trypsin-digested and analyzed by LC-MS/MS using an LTQ-FT mass spectrometer. The numbers of unique peptides that distinguished each protein from other BSUf members are indicated in parentheses. **(B-C)** Co-immunoprecipitation assays from double transgenic *Arabidopsis* plants co-expressing the indicated constructs. Myc-tagged and YFP-tagged constructs were under the control of the 35S and native promoter, respectively. Immunoprecipitations were performed from protein extracts of double transgenic *Arabidopsis* plants with anti-YFP antibodies. Associated proteins were immunoblotted with anti-myc and anti-YFP antibodies.

**A**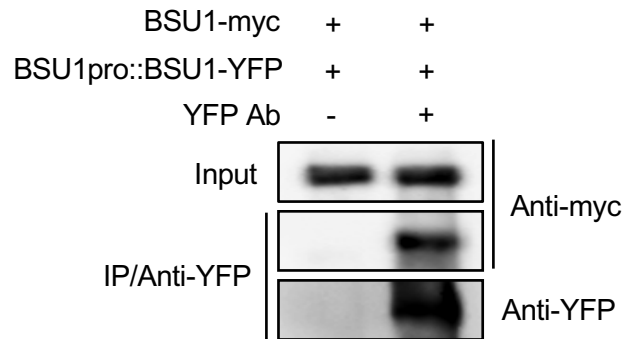**B**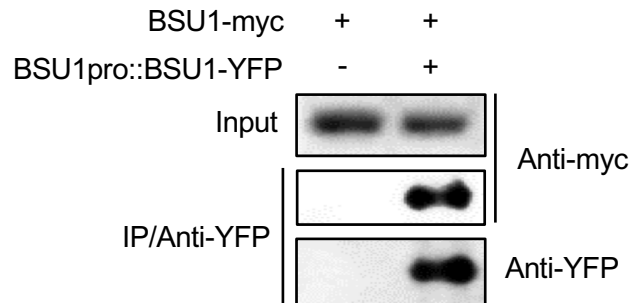

**Supplemental Figure 2. Homo-oligomerization of BSU1.** (A) BSU1-YFP interaction with BSU1-myc in plant extracts. BSU1-YFP immunoprecipitated by anti-YFP antibody from BSU1pro::BSU1-YFP plant was incubated with protein extracts of BSU1-myc plants. (B) Co-immunoprecipitation assay from double transgenic *Arabidopsis* plants co-expressing BSU1-YFP and BSU1-myc. Associated proteins were immunoblotted with anti-myc and anti-YFP antibodies. BSU1-YFP and BSU1-myc constructs were under the control of its native promoter and 35S promoter, respectively.

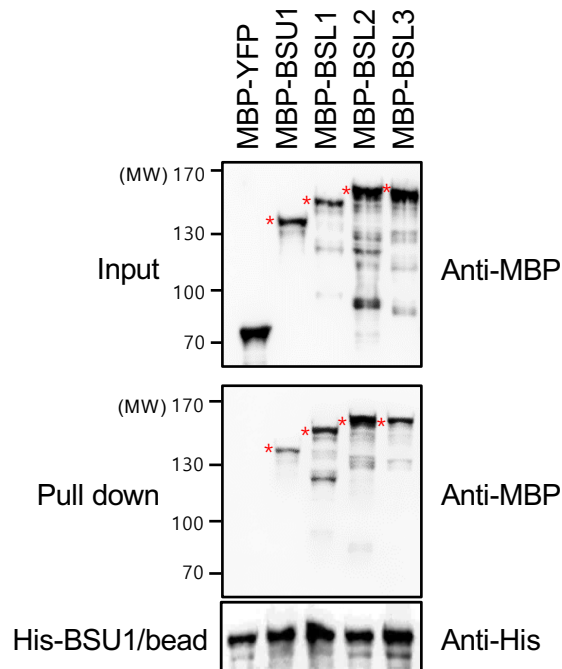

**Supplemental Figure 3. BSU1 interacts directly with each member of the BSU1 family *in vitro*.** *In vitro* pull down assay using BSU1 as bait and all four members of the BSU1 family as preys. MBP-fusion proteins of the BSU1 family members were pulled down with His-BSU1 immobilized on nickel agarose beads. Bound proteins were detected with anti-MBP antibodies. An asterisk indicates full length of MBP-BSUf proteins. The calculated molecular masses for MPB-YFP, MPB-BSU1, MBP-BSL1, MBP-BSL2, and MBP-BSL3 are 145 KDa, 153 KDa, 165 KDa, and 163 KDa, respectively.

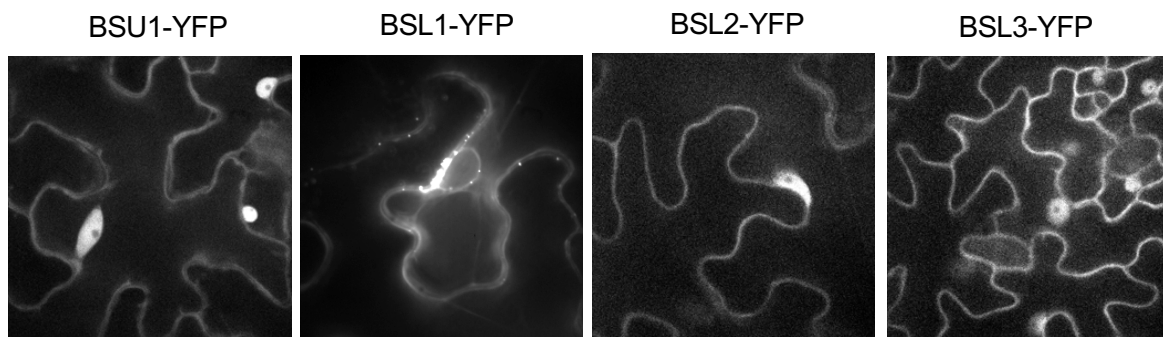

**Supplemental Figure 4. Subcellular localization of BSUf members in *Arabidopsis*.** Confocal microscope images of leaf epidermal cells of transgenic *Arabidopsis* plants expressing BSUf member fused to YFP are shown. All BSUf members were expressed by 35S-promoter.

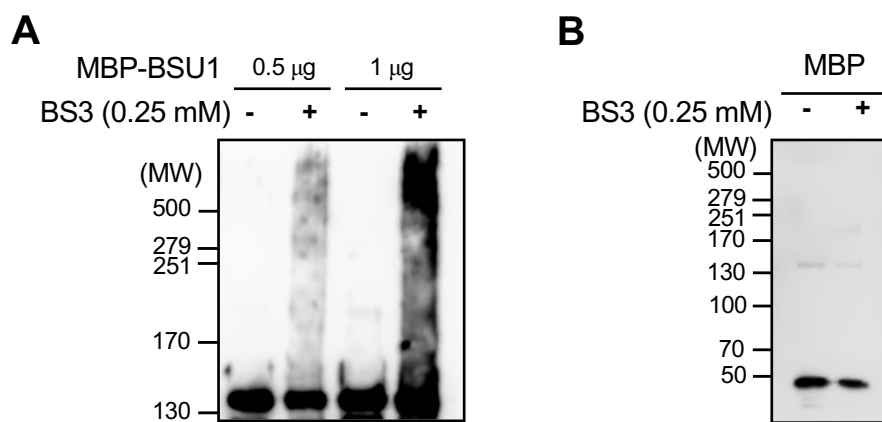

**Supplemental Figure 5. Oligomeric Status of BSU1 protein *in vitro*.** (A) Oligomerization of MBP-BSU1 after chemical cross-linking. MBP-BSU1 was cross-linked by BS3 treatment, separated by 5% SDS-PAGE gel, and detected by anti-MBP antibodies. (B) Chemical cross-linking of MBP. Proteins were separated by 7.5% SDS-PAGE gel, and detected by anti-MBP antibodies.

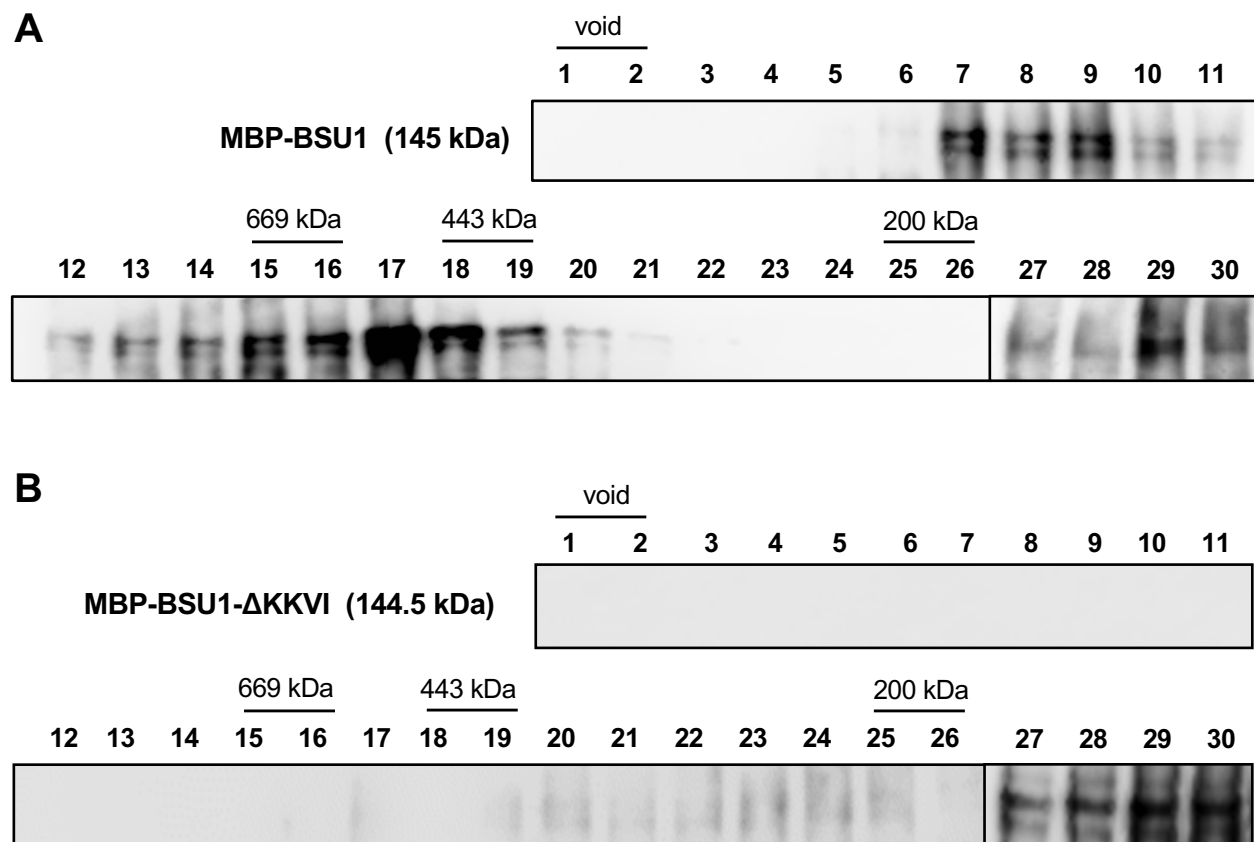

**Supplemental Figure 6. Gel filtration chromatography of MBP-BSU1 and MBP-BSU1-ΔKKVI.** MBP-BSU1 (**A**) or MBP-BSU1-ΔKKVI (**B**) was separated on a Superose 6 column and eluted fractions were collected. The proteins in each fraction were precipitated with trichloroacetic acid and analyzed by immunoblotting using anti-MBP antibodies. Dashed lines indicate fractions in which marker proteins with known molecular weights eluted.

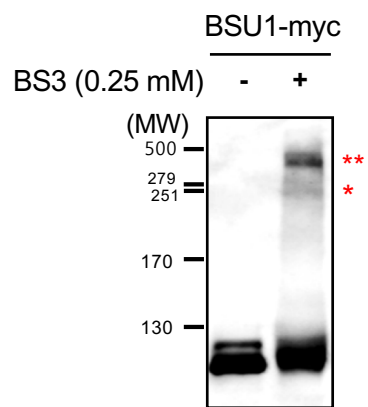

**Supplemental Figure 7. Oligomeric Status of BSU1 protein *in vivo*.** Oligomerization of BSU1-myc extracted from the transgenic plant overexpressing BSU1-myc. Single and double asterisk indicate dimeric and tetrameric forms, respectively.





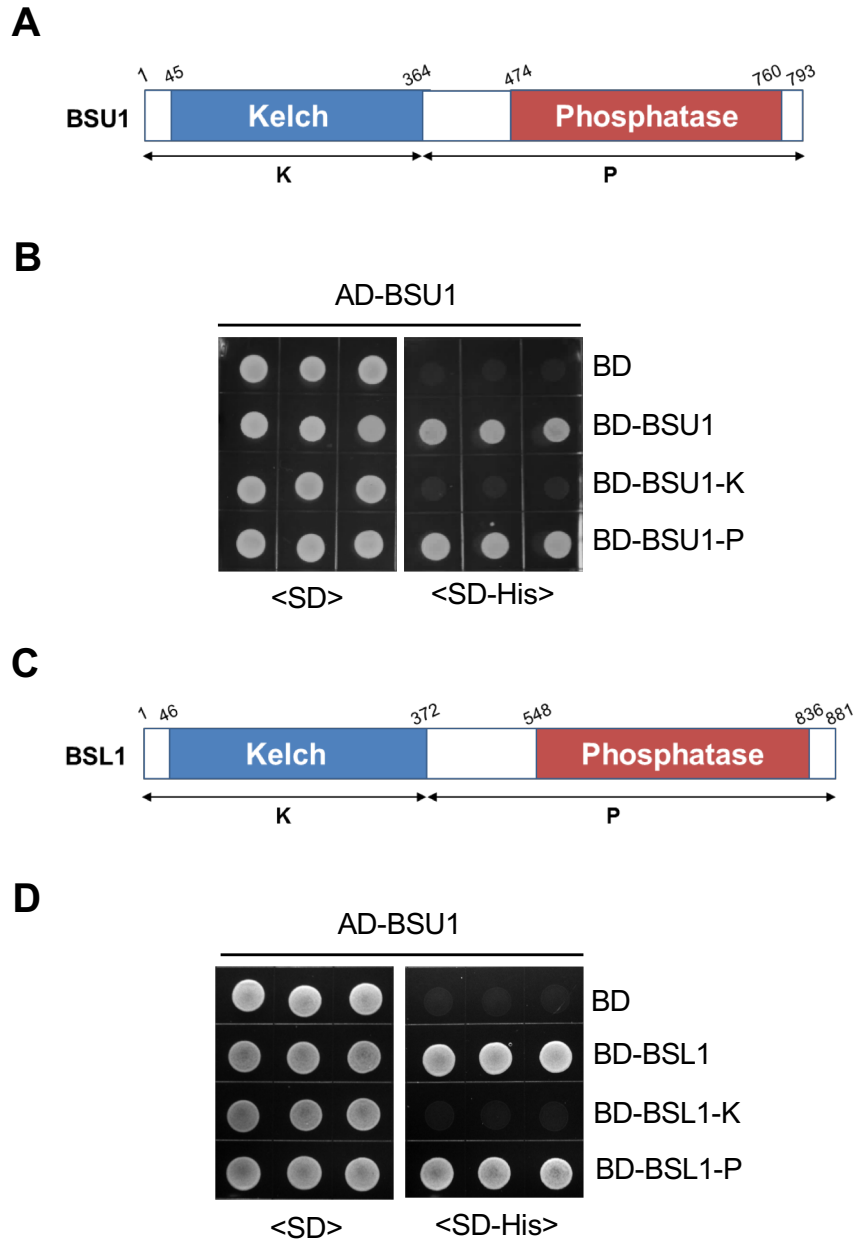

**Supplemental Figure 9. C-terminal region including phosphatase domain is essential for BSU1 interaction with BSU1 or BSL1. (A)** Schematic diagram of BSU1 structure. **(B)** Yeast two-hybrid assays between BSU1 and deletion constructs of BSU1. BD, BD-BSU1, BD-BSU1-K, and BD-BSU1-P plasmids were transformed into yeast cells containing AD-BSU1 constructs. **(C)** Schematic diagram of BSL1 structure. **(D)** Yeast two-hybrid assays between BSU1 and deletion constructs of BSL1. BD, BD-BSL1, BD-BSL1-K, and BD-BSL1-P plasmids were transformed into yeast cells containing AD-BSU1 constructs. Yeast cells were grown on synthetic dropout (SD) or SD-Histidine (His) medium.

**A**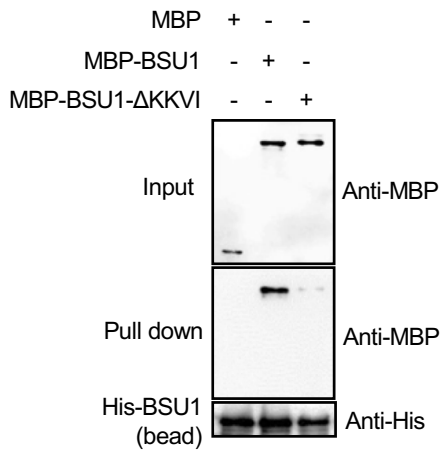**B**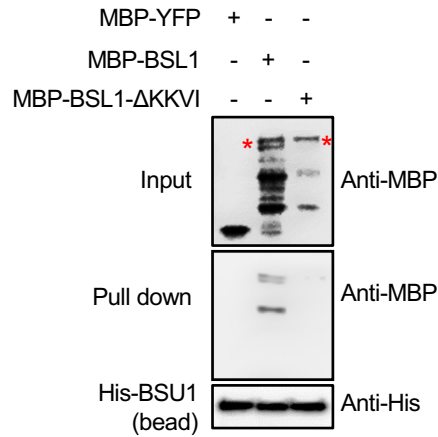**C**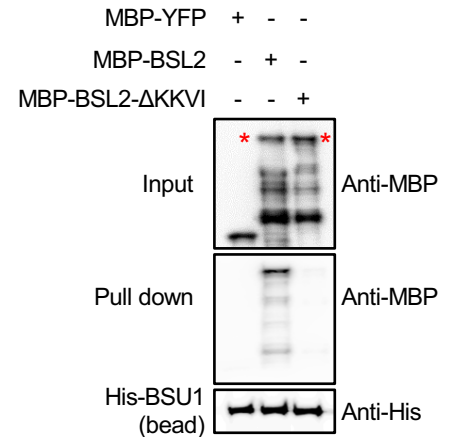

**Supplemental Figure 10. Identification of the Four Amino Acids that Mediate BSUf Oligomerization.** *In vitro* pull down assays to test the interaction between BSU1 and BSUf members containing the ΔKKVI mutation. His-BSU1 was immobilized on nickel agarose beads and then incubated with MBP-BSU1 or MBP-BSU1-ΔKKVI (**A**), MBP-BSL1 or MBP-BSL1-ΔKKVI (**B**), and MBP-BSL2 or MBP-BSL2-ΔKKVI (**C**), respectively. Captured proteins were analyzed by immunoblotting with anti-MBP antibodies. Asterisk indicates full length of protein.

**A**

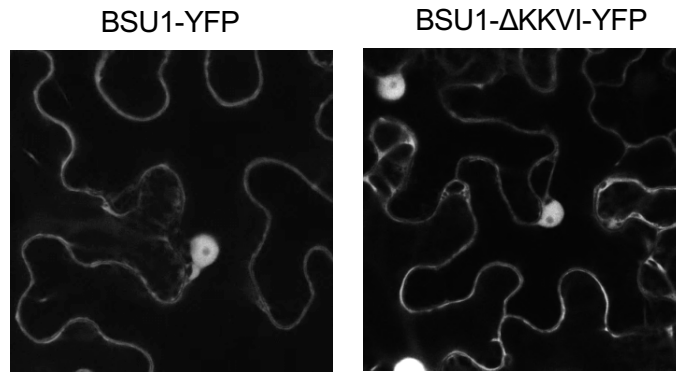

**B**

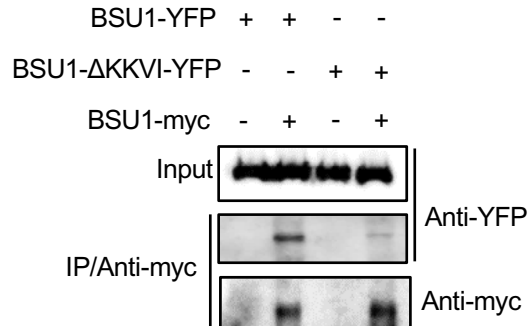

**Supplemental Figure 11. Subcellular localization of BSU1-YFP and BSU1-ΔKKVI-YFP, and their interaction with BSU1-myc in tobacco leaves. (A)** subcellular localization of BSU1-YFP and BSU1-ΔKKVI-YFP that were transiently expressed in tobacco leaf cells. **(B)** Co-immunoprecipitation of BSU1-YFP or BSU1-ΔKKVI-YFP with BSU1-myc in tobacco leaves. Immunoprecipitation was performed with anti-myc antibodies. Associated proteins were immunoblotted with anti-YFP and anti-myc antibodies.

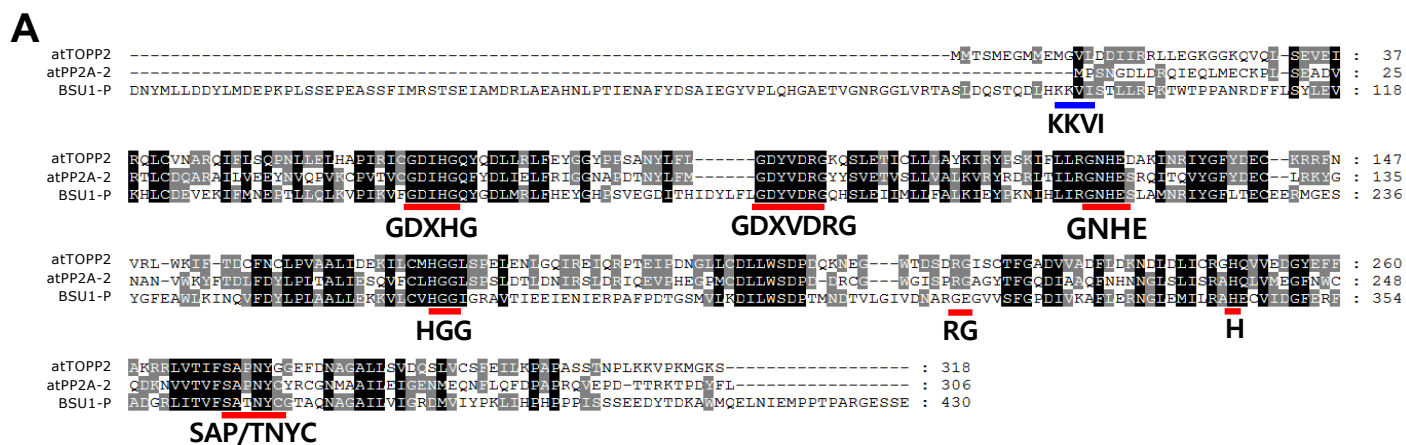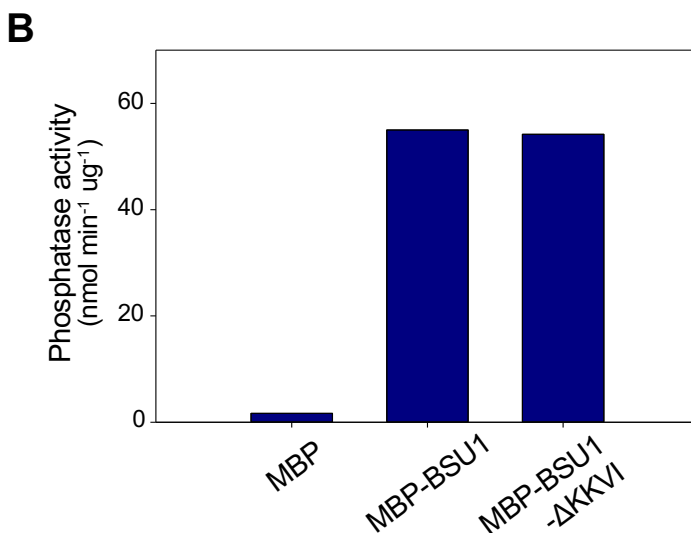

**Supplemental Figure 12. The deletion of KKVI residues does not alter phosphatase activity of BSU1. (A)** Alignment of amino acid sequences of BSU1 and other plant phosphatases. Amino acid sequences of full length of PP1 (atTOPPs; At5g19160), full length of PP2A catalytic subunit (atPP2A-2; At1g10430), and C-terminal region of BSU1 (365~793 residues) were compared. Core catalytic residues conserved in phosphatases are underlined with red color. KKVI residues of BSU1 are underlined with blue color. **(B)** Comparison of phosphatase activities of MBP-BSU1 and MBP-BSU1-ΔKKVI. pNPP was used as a substrate to determine phosphatase activity.

**A**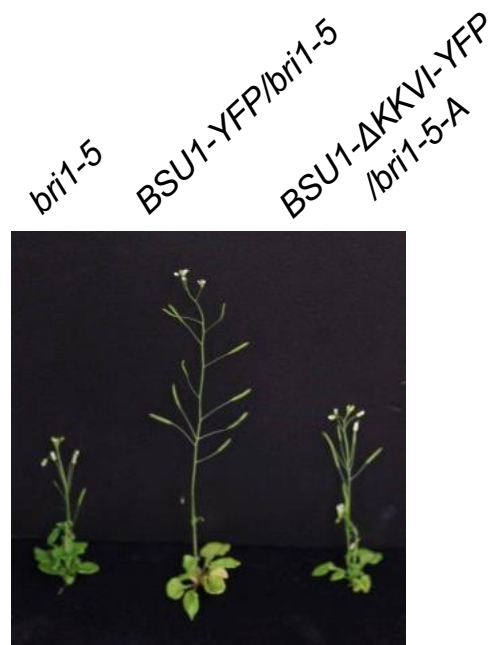**B**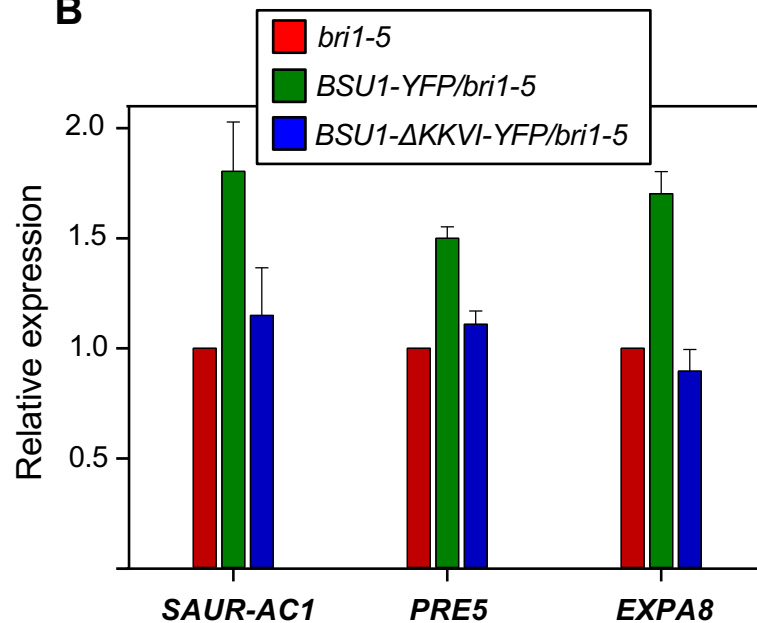

**Supplemental Figure 13. Oligomerization of BSUf is Required for the Activation of BR Signaling.** (A) Phenotypes of 4-week-old *bri1-5* mutants overexpressing either BSU1-YFP or BSU1-ΔKKVI-YFP. (B) BR-inducible gene expression in transgenic *bri1-5* mutants overexpressing BSU1 or BSU1-ΔKKVI. Quantitative RT-PCR analysis of expression levels of BR-regulated genes in the plants shown in Figure 1G.

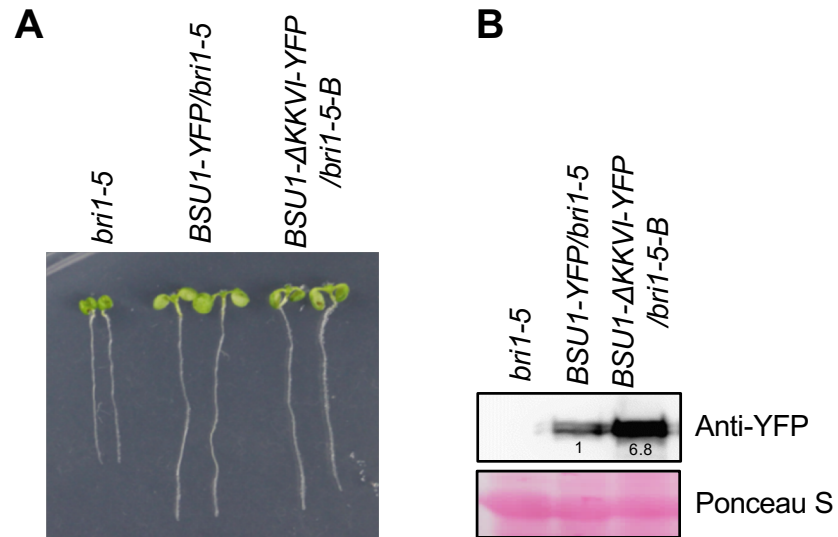

**Supplemental Figure 14. Phenotypes and protein level of *bri1-5* expressing BSU1-YFP or BSU1-ΔKKVI-YFP. (A)** Phenotype of 7-d-old *bri1-5* mutants expressing BSU1-YFP or BSU1-ΔKKVI-YFP. **(B)** Immunoblot analysis for protein expression level in *Arabidopsis* shown in **(A)**. Numbers indicate relative signal level.

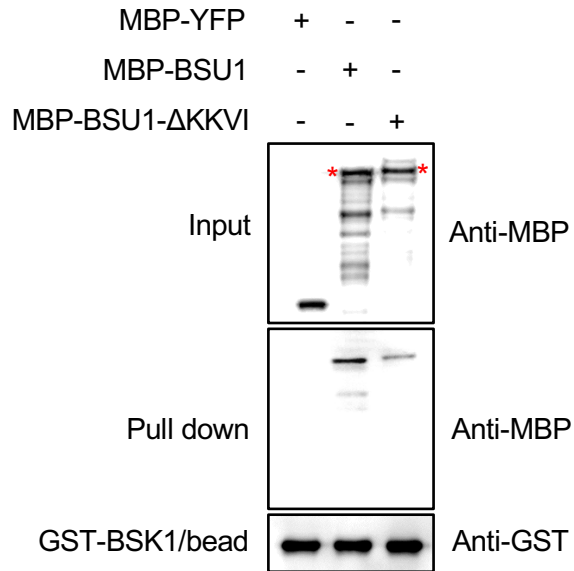

**Supplemental Figure 15. BSU1 oligomerization increases the binding affinity for BSK1.** MBP-YFP, MBP-BSU1, and MBP-BSU1- $\Delta$ KKVI were pulled down with GST-BSK1 and detected by anti-MBP antibodies.

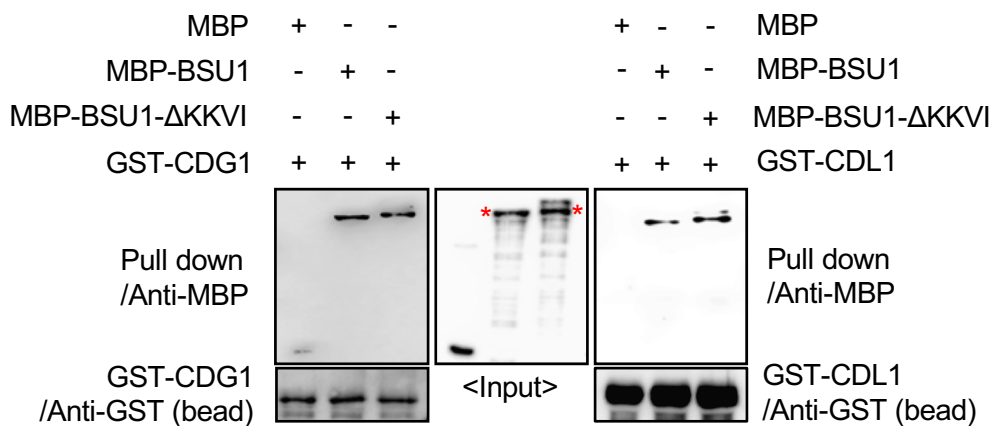

**Supplemental Figure 16. Oligomerization of BSU1 does not alter BSU1 binding affinity to CDG1 or CDL1.** MBP, MBP-BSU1 or MBP-BSU1-ΔKKVI was incubated with GST-CDG1 or GST-CDL1 immobilized on GST agarose beads, and immunoblot was detected by anti-MBP antibodies. An asterisk indicates full length of protein.



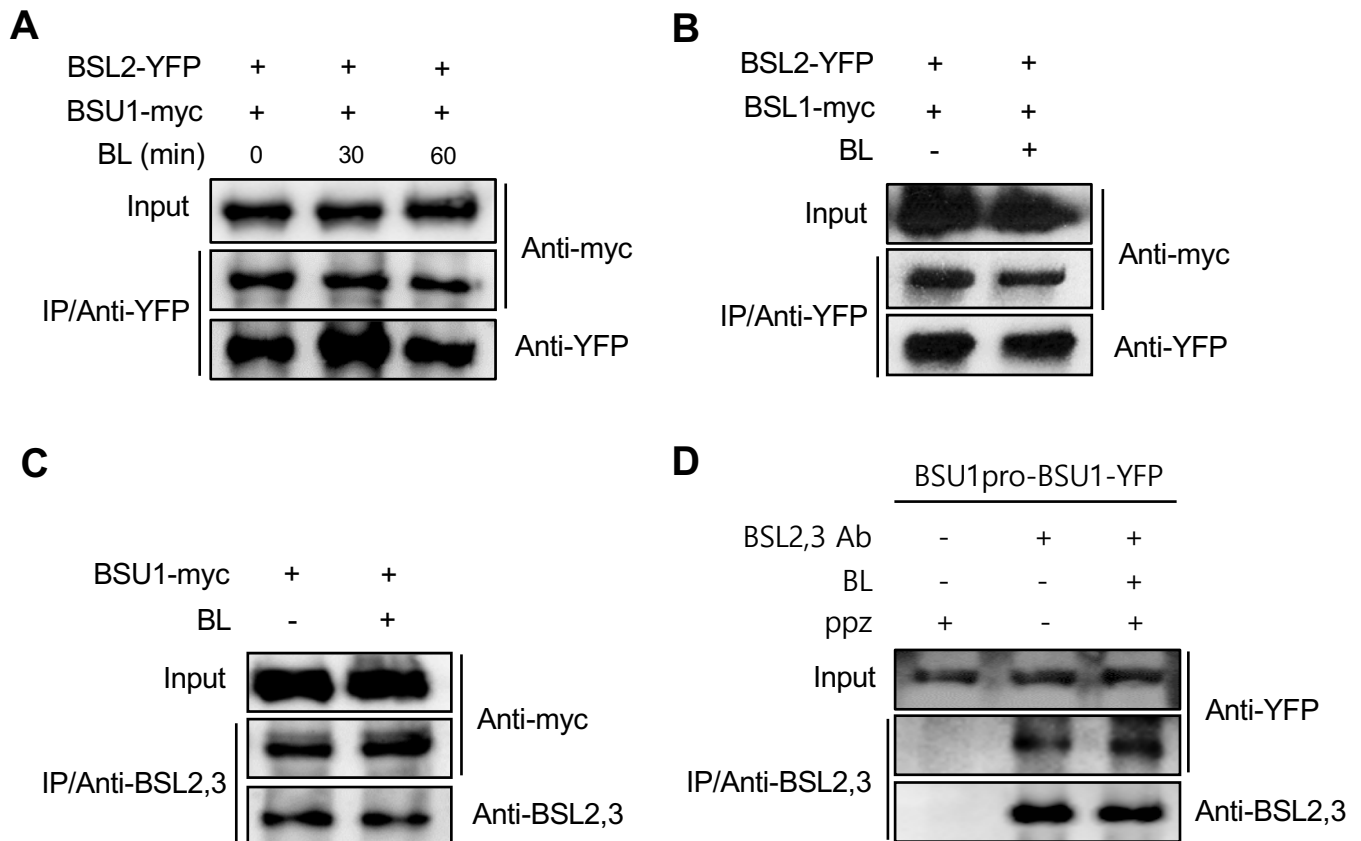

**Supplemental Figure 17. BL effects on the oligomerization between BSU members.** (A) Co-immunoprecipitation of BSU1 and BSL2 upon brassinolide (BL) treatment. *Arabidopsis* seedlings co-expressing 35S-BSU1-myc and BSL2pro-BSL2-YFP were treated with BL for the indicated times. Immunoprecipitations were then performed with anti-YFP antibodies and associated proteins were detected with anti-myc antibodies. (B) Co-immunoprecipitation of BSL1 and BSL2. Transgenic *Arabidopsis* plants co-expressing BSL2-YFP driven its native promoter and 35S-BSL1-myc were treated by mock or 100 nM of BL for 30 min. BSL2-YFP was immunoprecipitated with anti-YFP antibodies and the immunoblot was probed by anti-myc and anti-YFP antibodies. (C) Co-immunoprecipitation of BSU1 and BSL2,3. *Arabidopsis* plants expressing 35S-BSU1-myc were treated by mock or 100 nM of BL for 30 min. BSL2 and BSL3 were immunoprecipitated with anti-BSL2,3 antibody and the immunoblot was probed by anti-myc and anti-BSL2,3 antibodies. (D) Oligomerization of BSU1 with BSL2,3 in endogenous expression level. BSU1promoter-BSU1-YFP plants grown on MS medium containing 1  $\mu$ M propiconazole (ppz) were treated by mock or 100 nM of BL for 30 min.
